# Supplementary material
Source: PubMed Central journal article supplement (PMC5836109)
Supplement: 10.1074_M117.819136_jbc.M117.819136-1.pdf [file 10.1074_M117.819136_jbc.M117.819136-1.pdf]

# Macrophages with a Deletion for the Phosphoenolpyruvate Carboxykinase (Pck1) Gene

## Promote a More Pro-Inflammatory Phenotype

**Chih-Wei Ko<sup>1</sup>, Daniel Counihan<sup>1</sup>, Jing Wu<sup>2</sup>, Maria Hatzoglou<sup>2</sup>, Michelle A. Puchowicz<sup>1</sup> and  
Colleen M. Croniger<sup>1</sup>**

### Contents:

P.2 Supplementary Data Table 1: Sequences of primers used for RT-PCR.

P.3 Supplementary Data Figure 1: Protein expression of Pck1 in mouse tissues from

P4. Supplementary Data Figure 2: M3 isotopologues from U-[<sup>13</sup>C]glucose

P5. Supplementary Data Figure 3: M2 and M3 isotopologues from U-[<sup>13</sup>C]glutamine

P6. Supplementary Data Figure 4: Protein expression of ATF4 and BiP

# Supplementary Data Table 1 Primer Sequence

| Gene                                                                | Forward Primer          | Reverse Primer        |
|---------------------------------------------------------------------|-------------------------|-----------------------|
| ACC1 (acetyl CoA carboxylase 1)                                     | gcctttctgacaaaacgag     | tgatctgtctgtcctggag   |
| ACOX (Acox1 acyl-Coenzyme A oxidase 1, palmitoyl)                   | ttatgcgacagagatgg       | fatgtggcagtggttccaa   |
| CPT1a (carnitine palmitoyltransferase 1a, liver)                    | ccatgatggacccccacaaca   | cagggtctggcttttcac    |
| FASN (fatty acid synthase)                                          | cccttgatgaagaggatca     | caaggcgttagggtgacat   |
| IDE (insulin degrading enzyme)                                      | ataaccaagcaggctgcctt    | ttgggtgagcatgctgat    |
| IL-1 $\beta$ (interleukin 1 $\beta$ )                               | caggcaggcagtatcactca    | fgtctcatctggaaggtc    |
| IL-4 (interleukin 4)                                                | caaagctctcacagcaacg     | aagcaccttgaagccctac   |
| IL-6 (interleukin 6)                                                | gttctctggaaatctgga      | cagaattccattgcacaac   |
| IL-10 (interleukin 10)                                              | catgggtcttggagagaaa     | agtaggggaaccctctgagc  |
| IL-13 (interleukin 13)                                              | cggtccaagatctgtgtct     | ggggagtctgtcttgtgtg   |
| iNOS (Inducible nitric oxide synthase)                              | gacgagacggataggcagag    | gtggggttgttctgaactt   |
| LCAD (long-chain acyl-CoA dehydrogenase)                            | gagaagtgagtagagaggtctgg | aactcgtgttgagagcaagtc |
| MCP-1 (Monocyte Chemoattractant Protein 1)                          | aggtccctgtcatgtctctg    | cgtaactgcatctggctga   |
| Pck1 (phosphoenolpyruvate carboxykinase 1)                          | aagtcctgcactctgtgg      | caggcccagttgttgacc    |
| SREBP-1c (sterol regulatory element binding transcription factor 1) | tacttctgtggcccgtacc     | fggactgaagctggtgactg  |
| TNF $\alpha$ (tumor necrosis factor $\alpha$ )                      | agccccagctgtatcctt      | gagttggaccctgagccata  |

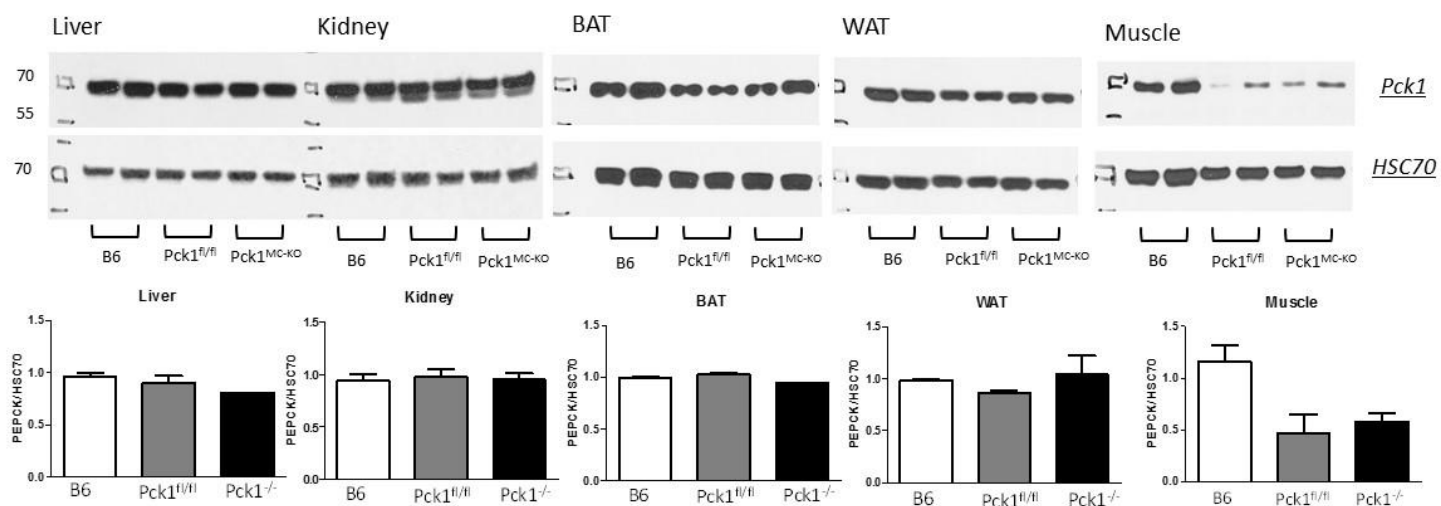

**Supplementary Figure 1. Pck1 protein expression in mouse tissues.** Mice were fasted and euthanized and tissues were collected. Protein expression for Pck1 was done using Western Blot analysis for the liver, kidney, brown adipose tissue (BAT), white adipose tissue (WAT) and skeletal muscle. The blots were normalized with heat shock cognate-70 (HSC70) to account for loading differences. The density of the immunoreactive bands was measured by scanning densitometry (UN-SCAN-IT, Orem, Utah). The values are the means  $\pm$ SEM for n= 7 mice per group. Abbreviations: C57BL/6J (B6), Pck1<sup>fl/fl</sup> (Pck1<sup>fllox/fllox</sup>) and LysM-Pck1 (Pck1<sup>MC-KO</sup>) mice.

## M3 isotopologue

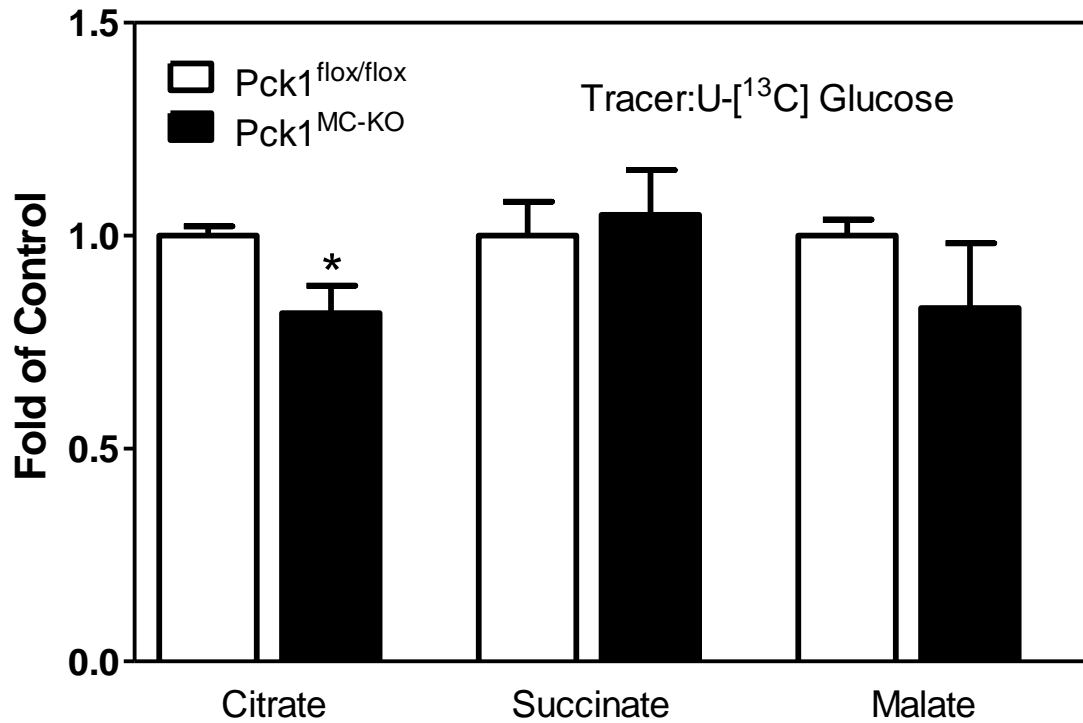

**Supplementary Figure 2:** BMDMs isolated from Pck1<sup>flox/flox</sup> and Pck1<sup>MC-KO</sup> mice were incubated with [U-<sup>13</sup>C]glucose in the presence of LPS for 16 hours and GC-MS was performed and contribution of <sup>13</sup>C to M2-CAC citrate, succinate and malate were measured. Values represent the means  $\pm$  SEM for n=6 per group. \*P < 0.05 and \*\*P<0.01 compared to Pck1<sup>flox/flox</sup> group.

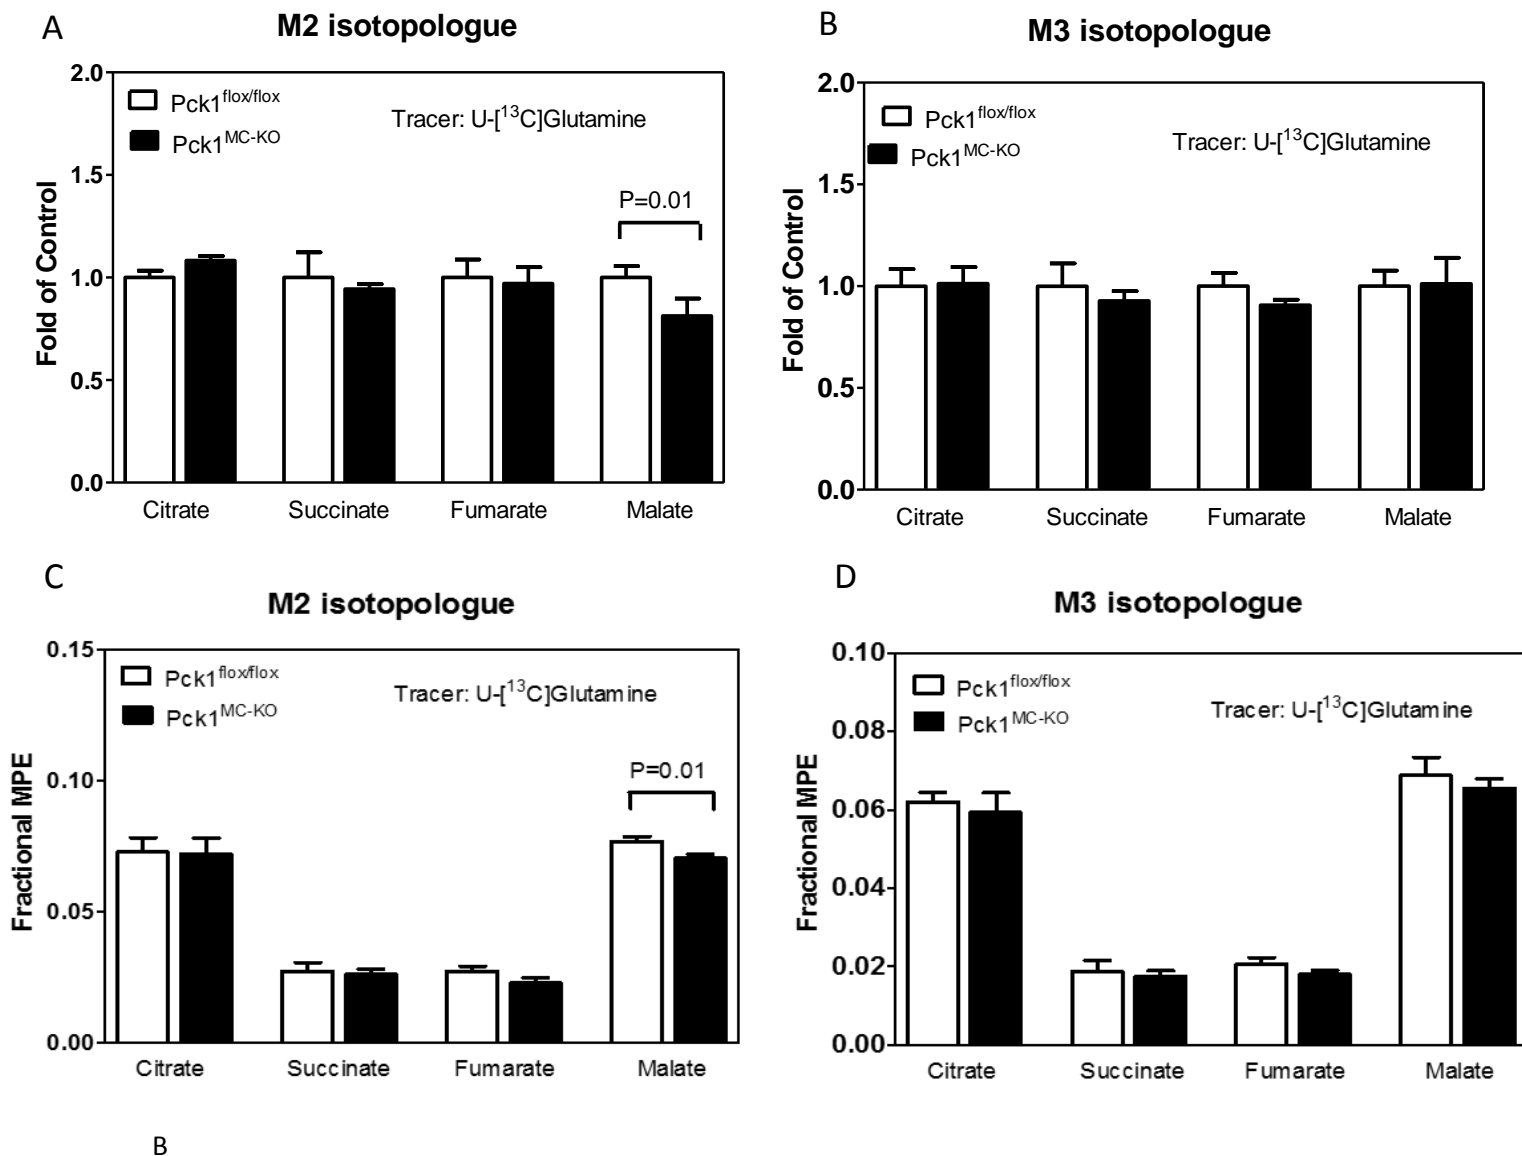

**Supplementary Figure 3:** BMDMs isolated from Pck1<sup>flox/flox</sup> and Pck1<sup>MC-KO</sup> mice were incubated with [U-<sup>13</sup>C]glutamine in the presence of LPS for 16 hours and GC-MS was performed for contribution of <sup>13</sup>C label to A) M2-CAC and B) M3-CAC represented as fold of control and C) M2-CAC and D) M3-CAC represented as fractional MPE. Values represent the means ± SEM for n=6 per group. \*P < 0.05 and \*\*P<0.01 compared to Pck1<sup>flox/flox</sup> group.

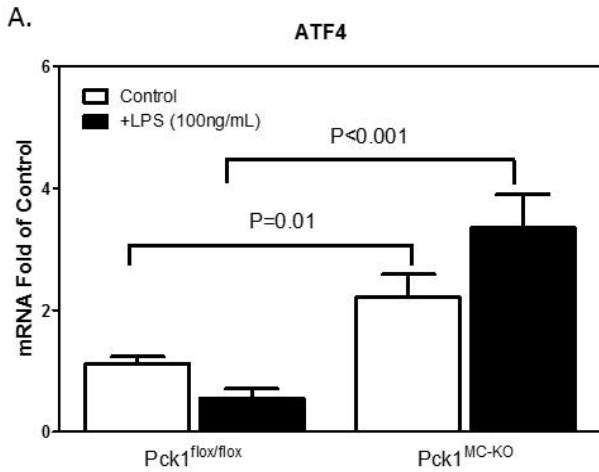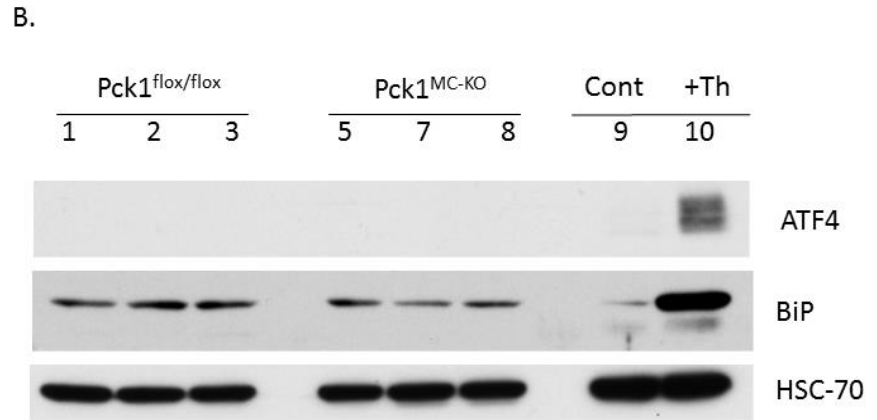

**Supplemental Figure 4. ATF and BiP expression in *Pck1<sup>MC-KO</sup>* cells.** BMDMs isolated and differentiated from *Pck1<sup>flox/flox</sup>* and *Pck1<sup>MC-KO</sup>* mice (n=8). A) The cells were stimulated with LPS (100ng/ml). ATF 4 mRNA expression in macrophage treated with or without LPS were measured by qRT-PCR. B) After treatment with LPS (100ng/ml) whole cell lysates were made and immunoblotted for the indicated proteins. Control unstimulated MEF cells (Cont) and MEF cells treated with 400 nM thapsigargin (+Th). The values are the means  $\pm$  SEM normalized with 18s rRNA and expressed as fold difference over *Pck1<sup>flox/flox</sup>*. Abbreviations: ATF-4 (Activating transcription factor 4), BiP (GRP78/BiP) and (HSC-70 (heat shock cognate 70)).
